# Supplementary material
Source: PubMed Central journal article supplement (PMC2824261)
Supplement: 0911268107_pnas.200911268SI.pdf [file 0911268107_pnas.200911268SI.pdf]

# Supporting Information

Okamoto et al. 10.1073/pnas.0911268107

## SI Methods

**Subjects.** Twenty healthy, normal hearing subjects (five females) between 21 and 43 years of age (mean, 29.6 years) participated in a behavioral study that investigated whether the probands could reliably perceive a phantom “auditory afterimage” sensation known as “Zwicker tone (1)” after the cessation of notched music.

**Stimuli and Experimental Design.** We presented auditory stimuli of 10-s duration diotically. The participants were supposed to report whether they could perceive a Zwicker tone right after the cessation of these stimuli or not (two-forced choice). We presented four different types of sound stimuli: white noise, notched noise, normal music, and notched music. Notched noise and notched music were prepared from white noise (sampling rate: 44,100 Hz) or normal music (sampling rate: 44,100 Hz) by eliminating the one octave wide frequency band centered at 4 kHz. We used eight different pieces of normal music and eight corresponding pieces

of notched music for this study. The sound stimuli were adjusted to have identical overall root-mean-square power. We randomly presented each sound stimulus type eight times with intensity of 40 dB SPL.

**SI Results.** The means and standard deviations of the rates that the participants reported the phantom auditory sensation to be present were  $34.4\% \pm 34.1\%$  (white noise),  $64.4\% \pm 36.8\%$  (notched noise),  $21.3\% \pm 15.2\%$  (normal music),  $20.0\% \pm 16.9\%$  (notched music). Paired  $t$  tests revealed a significant difference between the white noise and the notched noise conditions ( $t_{19} = 4.445$ ,  $P < 0.001$ ); however, there was no significant difference between the normal music and the notched music conditions ( $t_{19} = 0.295$ ,  $P = 0.772$ ). Therefore, it seems that the notched noise could cause the Zwicker tone, whereas the notched music could not.

1. Zwicker E (1964) Negative afterimage in hearing. *J Acoust Soc Am* 36:2413–2415.

## Other Supporting Information Files

### Target Notched Music

Movie S1. Example of target notched music.

[Movie S1](#)

### Placebo Notched Music

Movie S2. Example of placebo notched music.

[Movie S2](#)

### Original Music

Movie S3. Example of original (non-modified) music.

[Movie S3](#)
